# Supplementary material for: Synthesis and in vitro evaluation of donepezil-based reactivators and analogues for nerve agent-inhibited human acetylcholinesterase
Source: Royal Society of Chemistry journal article supplement (doi:10.1039/c5ra25477a), 2016-01-01
Supplement: c5ra25477a1.pdf [file c5ra25477a1.pdf]

## Supporting Information

### Synthesis and *in vitro* evaluation of donepezil-based reactivators and analogues for nerve agent-inhibited human acetylcholinesterase

*Julien Renou, José Dias, Guillaume Mercey, Tristan Verdelet, Catherine Rousseau, Anne-Julie Gastellier, Mélanie Arboléas, Mélanie Touvrey-Loiodice, Rachid Baati, Ludovic Jean\*, Florian Nachon, Pierre-Yves Renard\**

#### Table of contents

|                                                                  |   |
|------------------------------------------------------------------|---|
| 1. Biological assays .....                                       | 2 |
| 2. <sup>1</sup> H and <sup>13</sup> C NMR Spectra and HPLC ..... | 7 |

## 1. Biological assays

Time-dependent reactivation of VX-inhibited hAChE and GB-inhibited hAChE by 100  $\mu\text{M}$  of **1**, for the determination of  $k_{\text{obs}}$  (See Table 1 and experimental section).

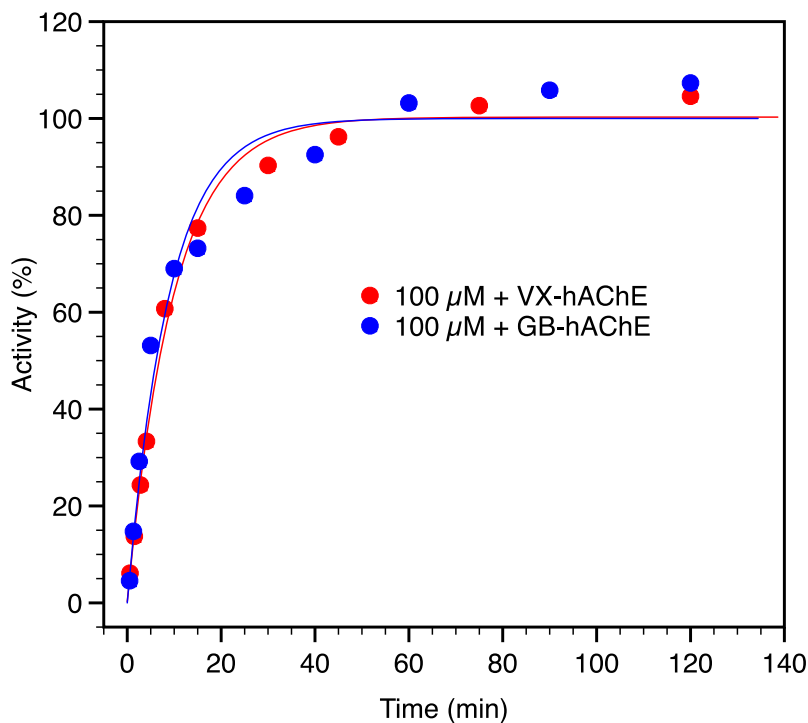

Time-dependent reactivation of VX, paraoxon (POX), tabun (GA)-inhibited hAChE and VX-inhibited hBChE by 100  $\mu\text{M}$  of **2**, for the determination of  $k_{\text{obs}}$  (See Table 1 and experimental section).

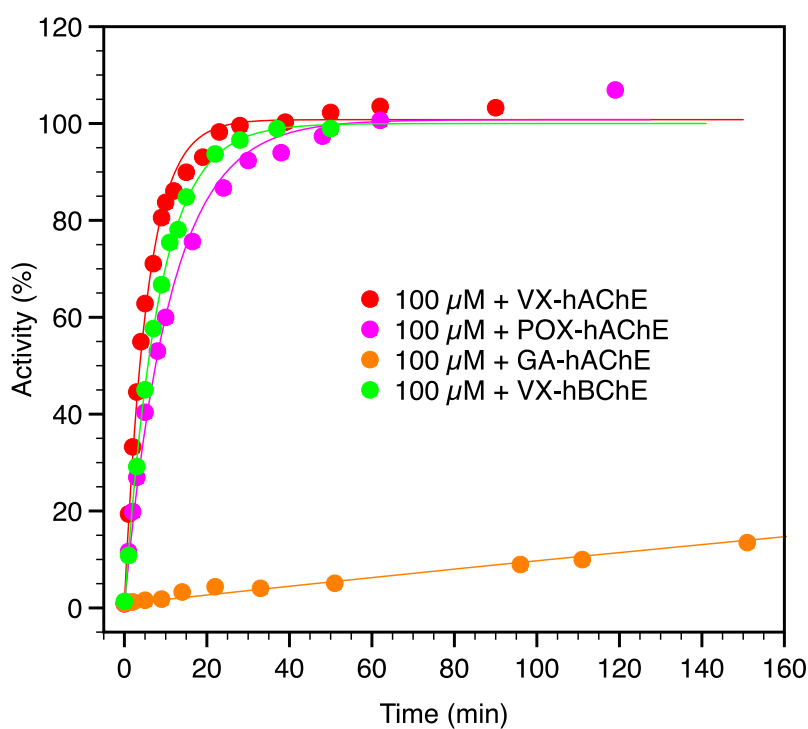

Time-dependent reactivation of VX-, paraoxon (POX-), tabun (GA)-inhibited hAChE by 50  $\mu\text{M}$  of **3**, for the determination of  $k_{\text{obs}}$  (See Table 1 and experimental section).

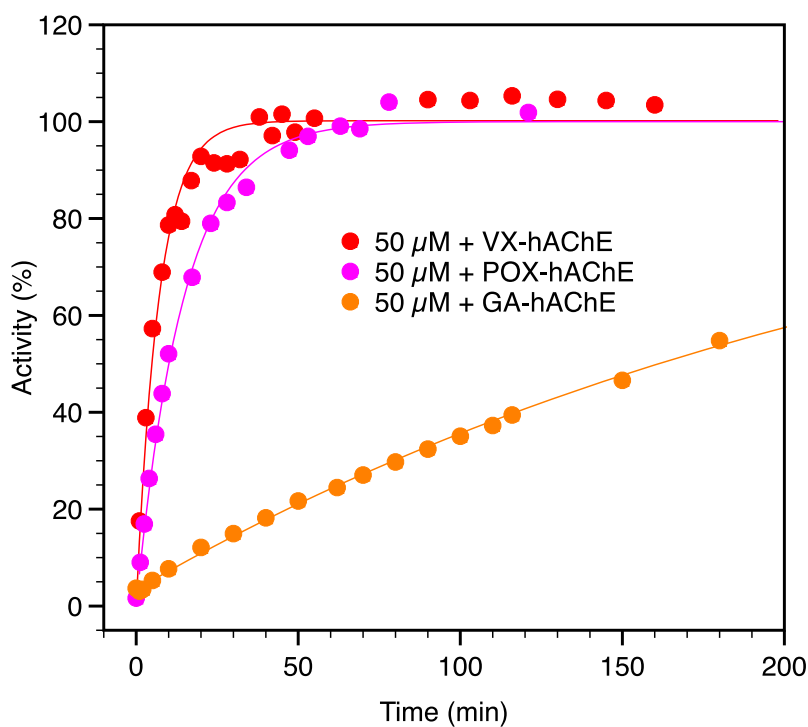

Time-dependent reactivation of VX-, paraoxon or POX-, tabun by 100  $\mu\text{M}$ , of GA-inhibited hAChE by 50  $\mu\text{M}$  of **4**, and VX-inhibited hBChE by 100  $\mu\text{M}$  of **4**, for the determination of  $k_{\text{obs}}$  (See Table 1 and experimental section).

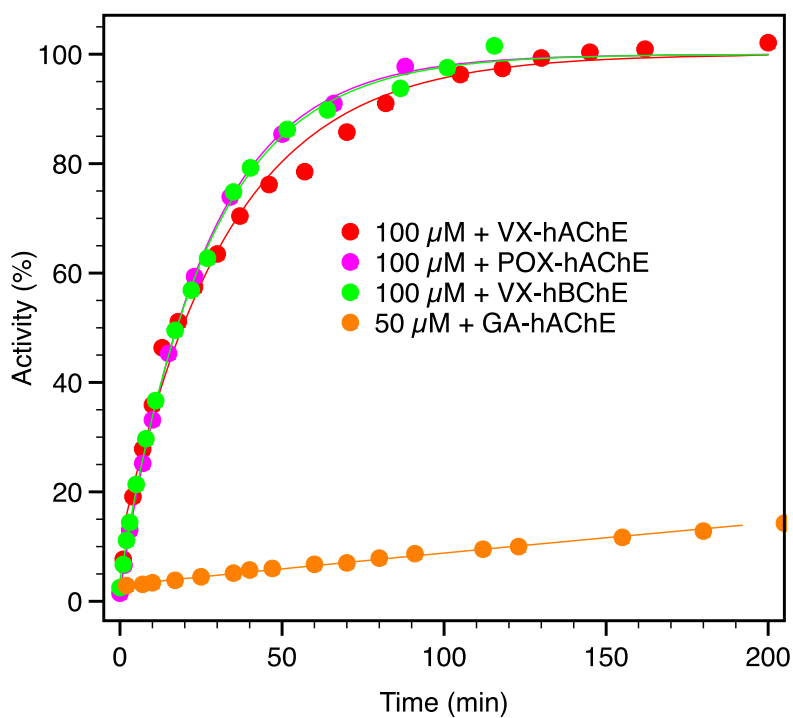

Concentration-dependent reactivation of VX- and GB-inhibited hAChE by compound **1** for the determination of  $k_r$ ,  $K_D$  and  $k_{r2}$  (See Table 1 and experimental section)

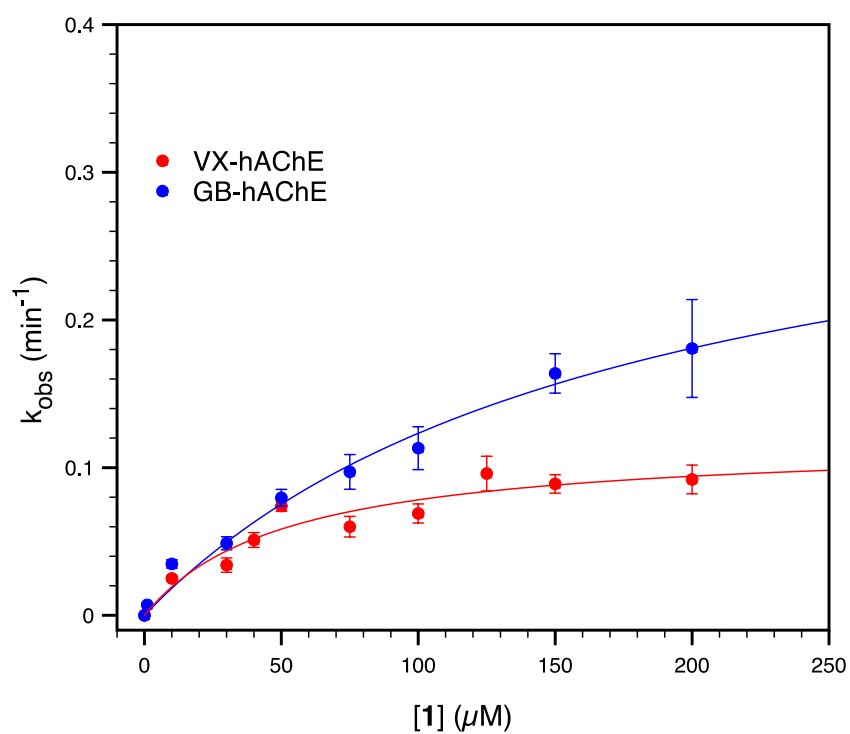

Concentration-dependent reactivation of VX-inhibited hBChE, VX-inhibited hAChE and paraoxon-inhibited hAChE by compound **2** for the determination of  $k_r$ ,  $K_D$  and  $k_{r2}$  (See Table 1 and experimental section)

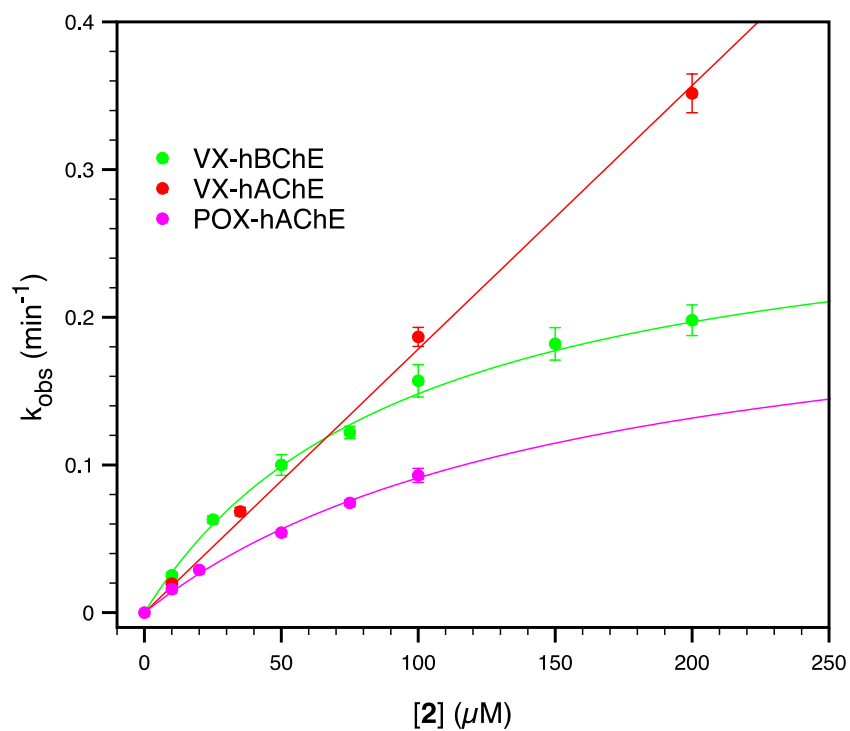

Concentration-dependent reactivation of VX- and paraoxon-inhibited hAChE by compound **3** for the determination of  $k_r$ ,  $K_D$  and  $k_{r2}$  (See Table 1 and experimental section)

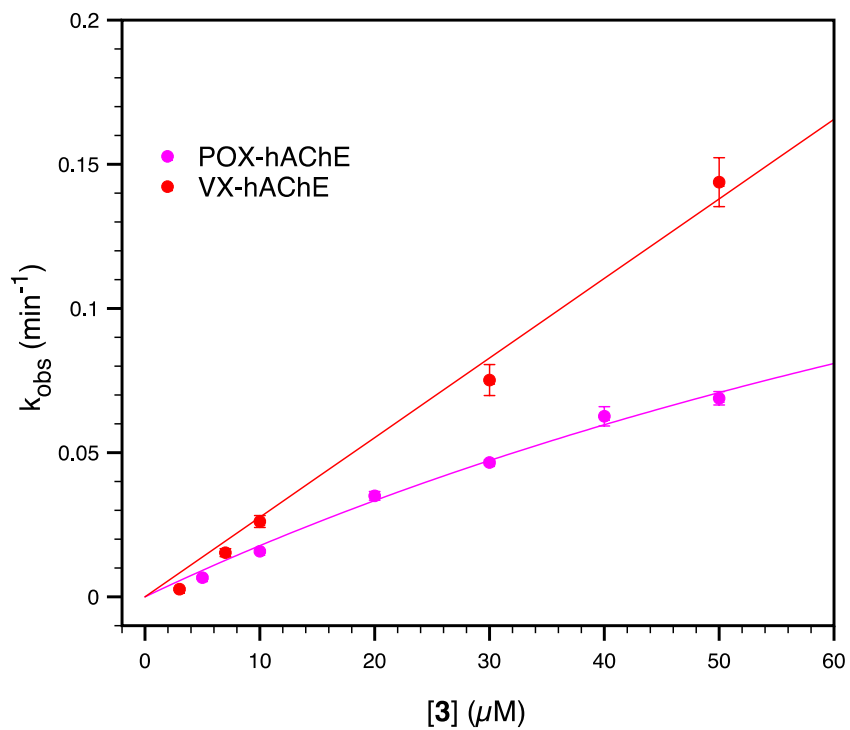

Concentration-dependent reactivation of VX-inhibited hAChE by compound **4** for the determination of  $k_{r2}$  (See Table 1 and experimental section)

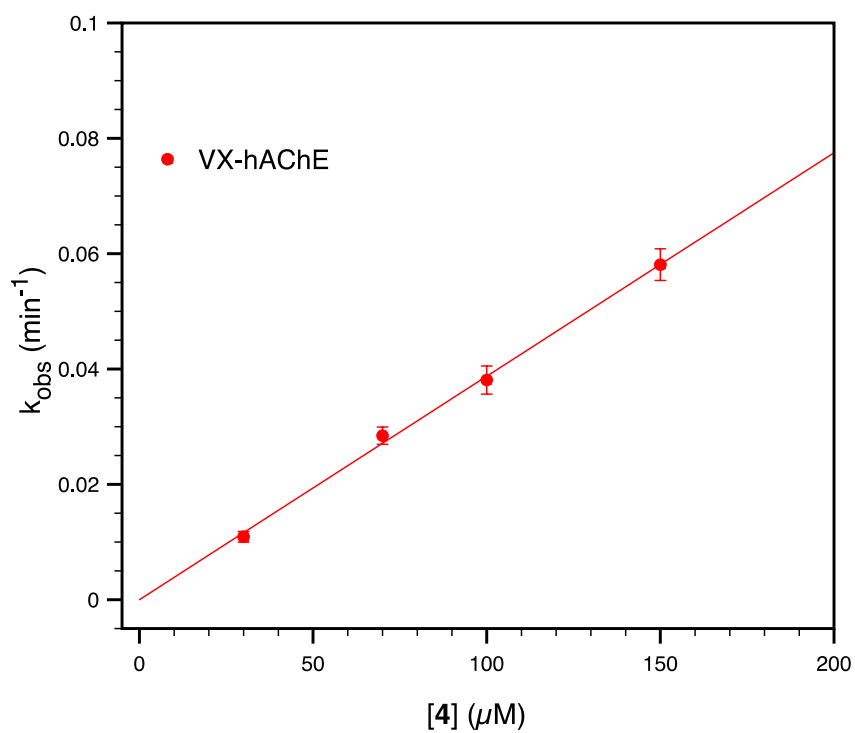

IC<sub>50</sub> of compound 1 for hAChE

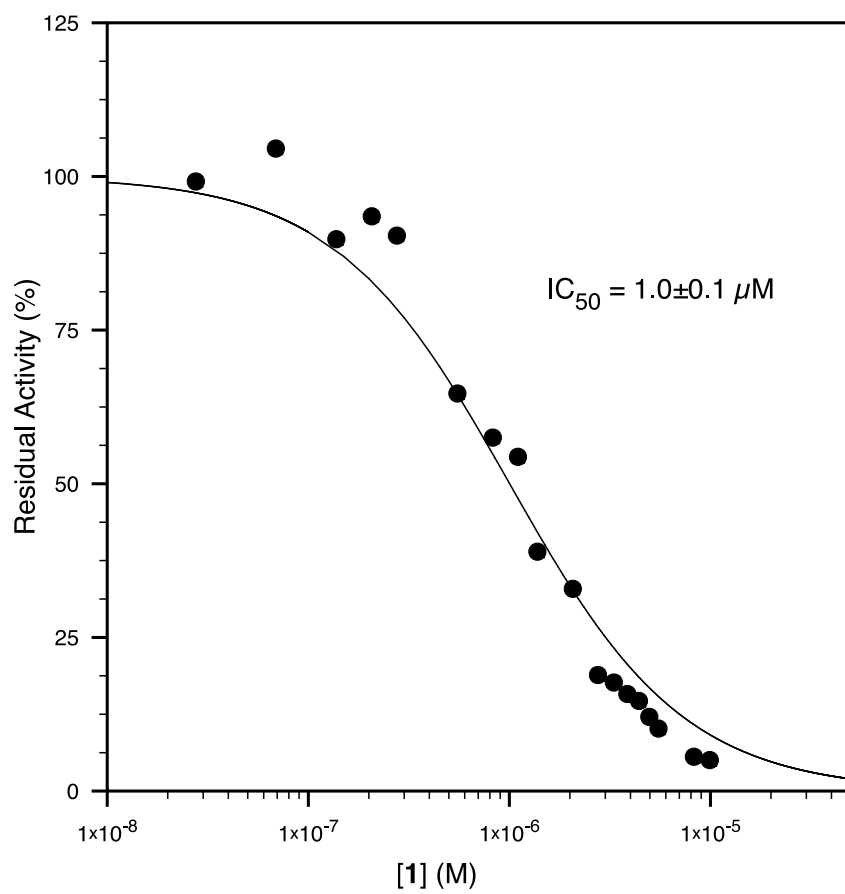

## 2. <sup>1</sup>H and <sup>13</sup>C NMR Spectra and HPLC

```

FC 035
EXPNO 110
PROCNO 1
Date_ 20130722
Time_ 10.46
INSTRUM spect
PROBHD 5 mm PABBO BB-
PULPROG ZG30
TD 65536
SOLVENT MeOD
NS 8
DS 2
SWH 6188.119 Hz
FIDRES 0.094423 Hz
AQ 5.2953587 sec
RG 138.22
DW 80.800 usec
DE 6.50 usec
TE 295.7 K
D1 1.00000000 sec
TD0 1

===== CHANNEL f1 =====
NUC1 1H
P1 15.50 usec
SI 65536
SF 300.1300047 MHz
WDW EM
SSB 0
LB 0.30 Hz
GB 0
PC 1.00
  
```

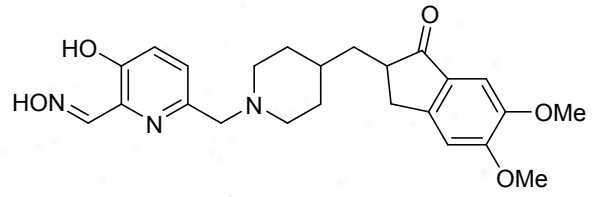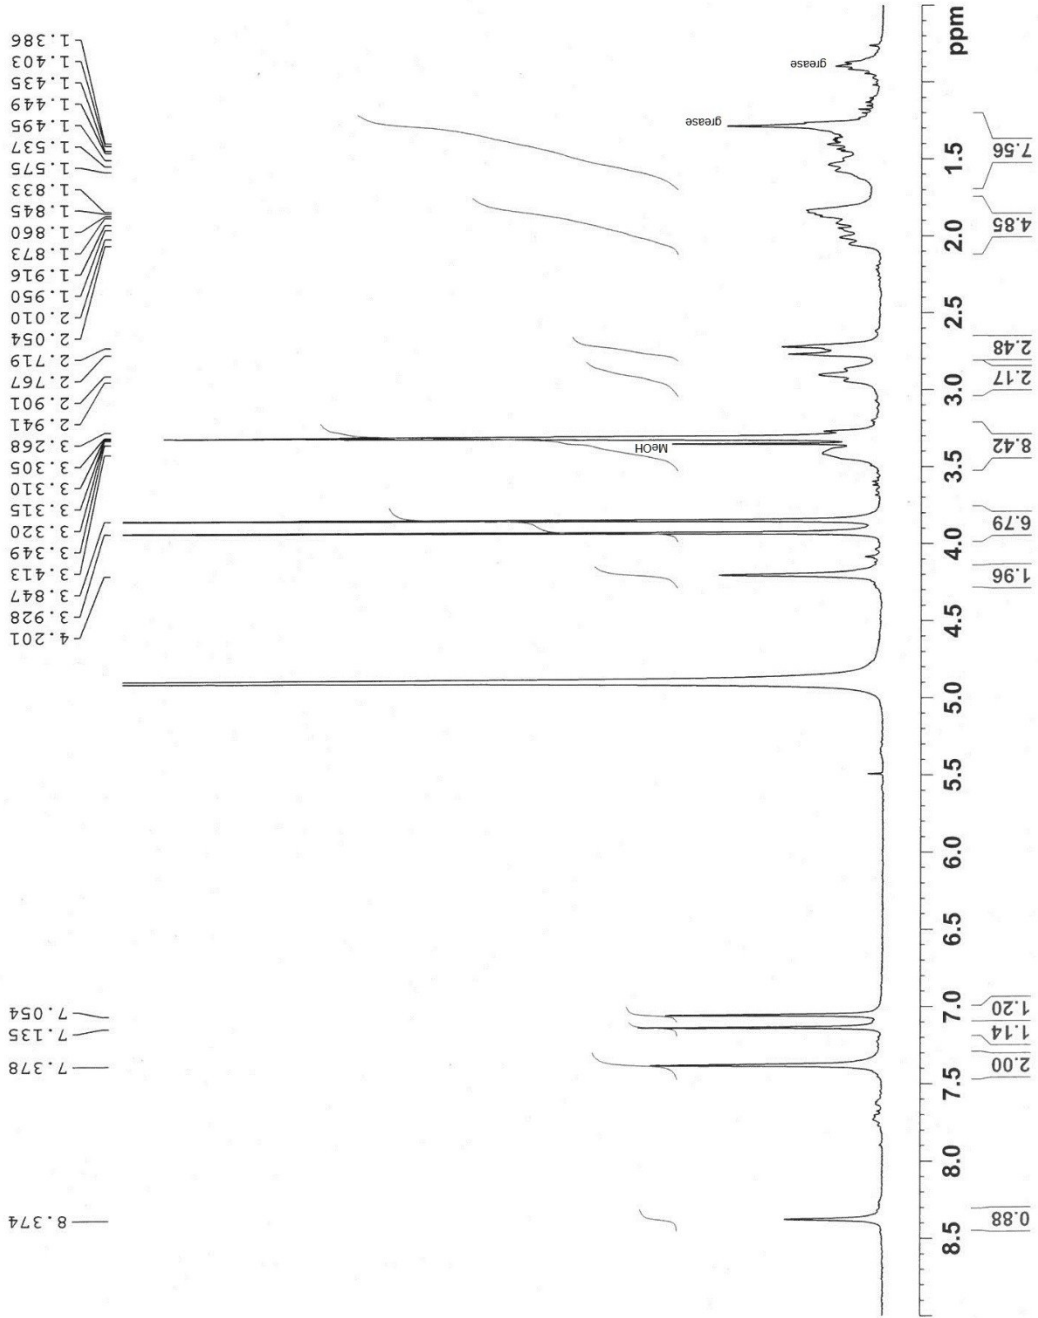

FC 035 - 2

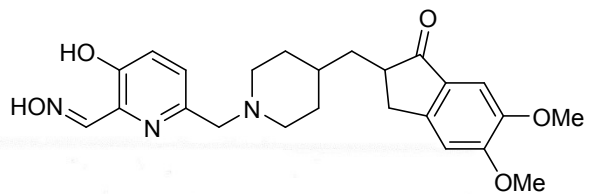

1

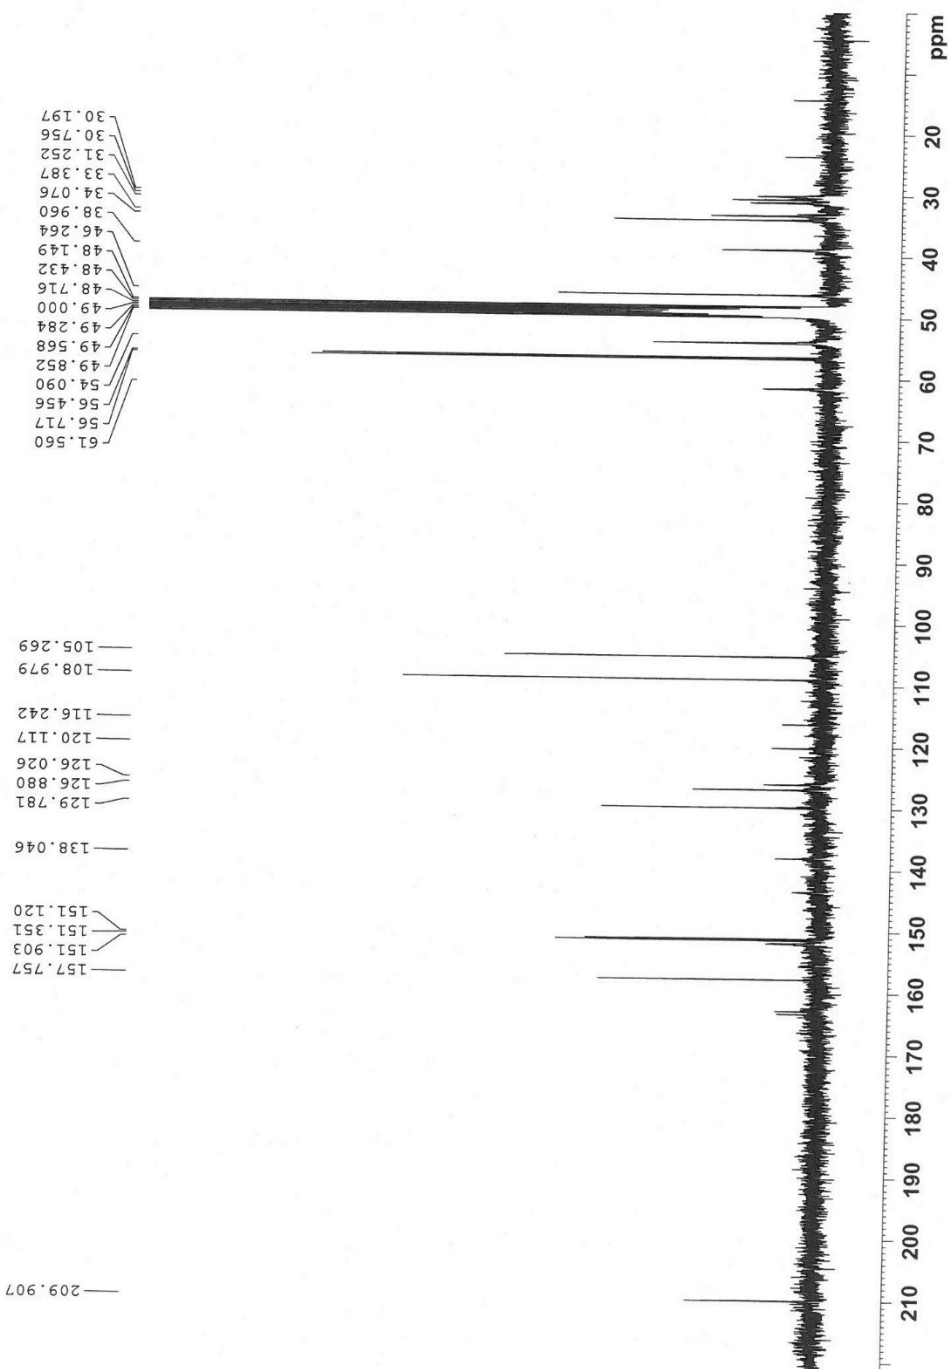

FC 035 - 2 C13



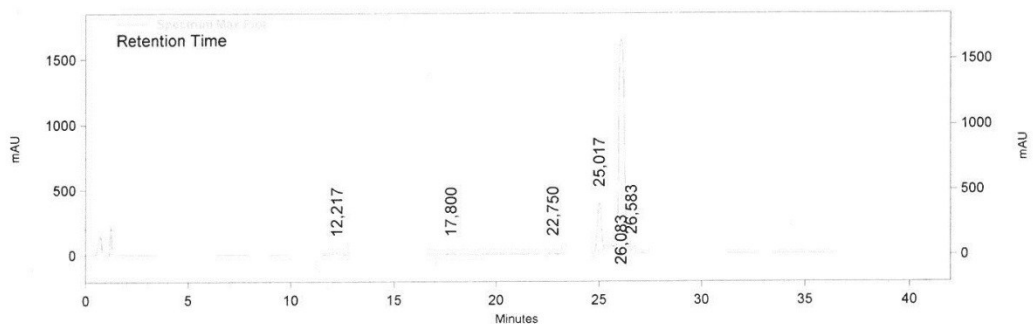

Spectrum Max  
 Plot Results  
 (System  
 (22/10/2012  
 16:29:17)  
 (Reprocessed))

| Retention Time | Height  | Height Percent | Area     | Area Percent |
|----------------|---------|----------------|----------|--------------|
| 12,217         | 12730   | 0,637          | 520777   | 1,499        |
| 17,800         | 9789    | 0,490          | 185951   | 0,535        |
| 22,750         | 10654   | 0,533          | 160529   | 0,462        |
| 25,017         | 363916  | 18,218         | 5240816  | 15,082       |
| 26,083         | 1600511 | 80,122         | 28641544 | 82,423       |
| 26,583         | 0       | 0,000          | 0        | 0,000        |
| Totals         | 1997600 | 100,000        | 34749617 | 100,000      |

Under these non-optimized HPLC conditions, the basic compound **1** is partially protonated and the purity (97.5%) was determined by the sum of the two peak areas of the protonated form ( $t_R = 26.08$  min) and of the unprotonated form ( $t_R = 22.48$  min). The UV absorption spectra were completely similar.

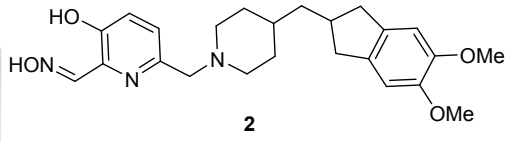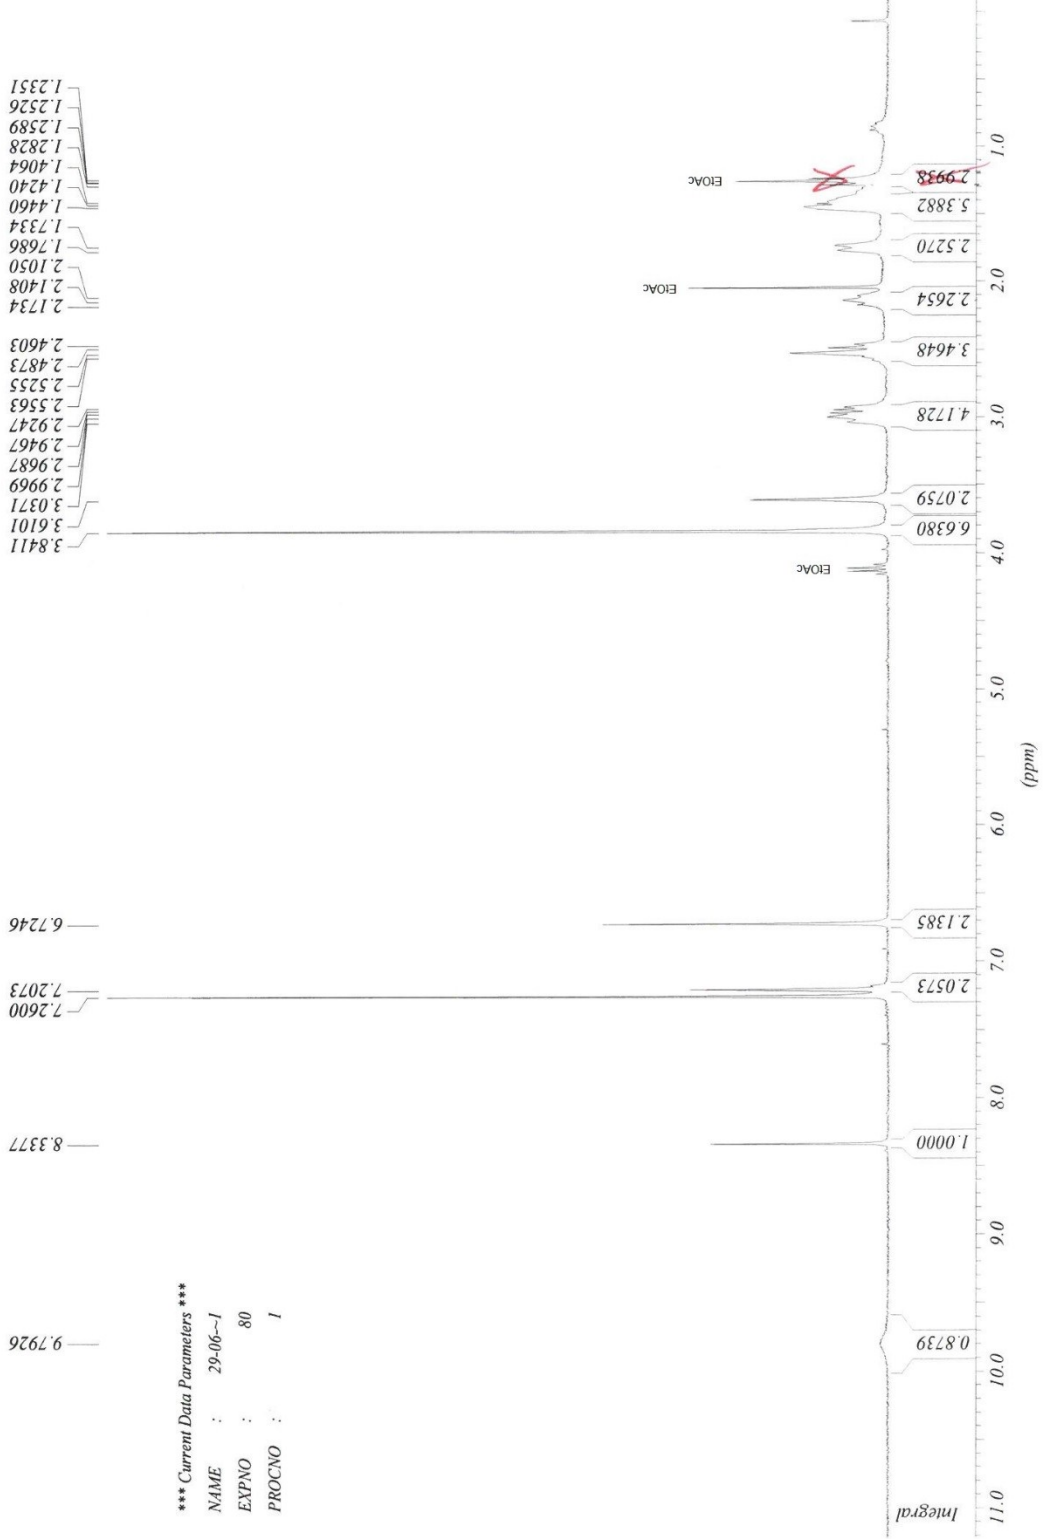

\*\*\* Current Data Parameters \*\*\*  
 NAME : 29-06-1  
 EXPNO : 80  
 PROCNO : 1

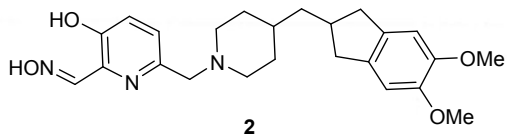

14.3358  
 21.2160  
 29.8418  
 31.7328  
 34.2784  
 37.7840  
 39.5586  
 42.6496  
 54.2137  
 56.1847  
 60.5630  
 64.0904

107.9321  
 124.2236  
 125.5764  
 134.9950  
 135.8168  
 147.8973  
 153.7011

\*\*\* Current Data Parameters \*\*\*  
 NAME : 01-07-1  
 EXPNO : 74  
 PROCNO : 1

lv4-024

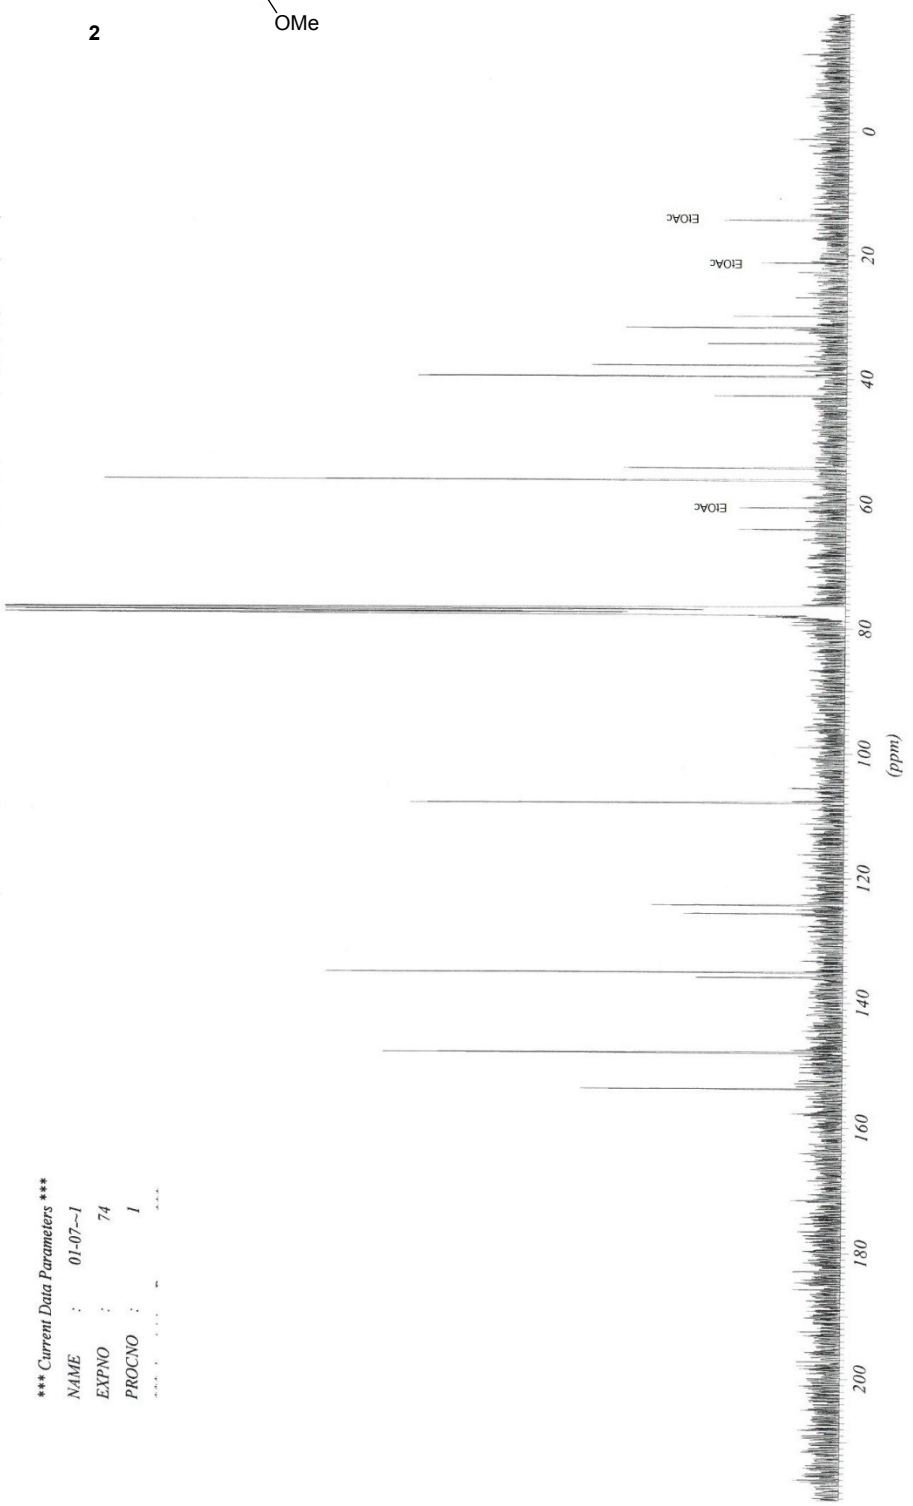

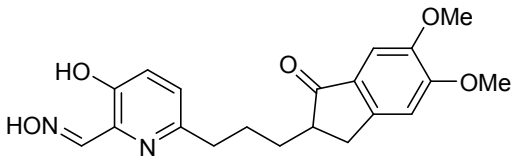

3

```

Current Data Parameters
NAME      gml175f2
EXPNO    88
PROCNO   1

F2 - Acquisition Parameters
Date_    20100429
Time     19.45
INSTRUM spect
PROBHD   5 mm QNP 1H/1
PULPROG zg30
TD       65536
SOLVENT  CDCl3
NS       8
DS       2
SWH      6172.839 Hz
FIDRES   0.094190 Hz
AQ       5.3084660 sec
RG       287.4
DW       81.000 usec
DE       10.00 usec
TE       294.2 K
D1       1.00000000 sec
TD0      1

===== CHANNEL f1 =====
NUC1     1H
P1       10.62 usec
PL1      0.00 dB
SFO1     300.1318534 MHz

F2 - Processing parameters
SI       32768
SF       300.1300084 MHz
WDW      EM
SSB      0
LB       0.30 Hz
GB       0
PC       1.00
  
```

gml175f2

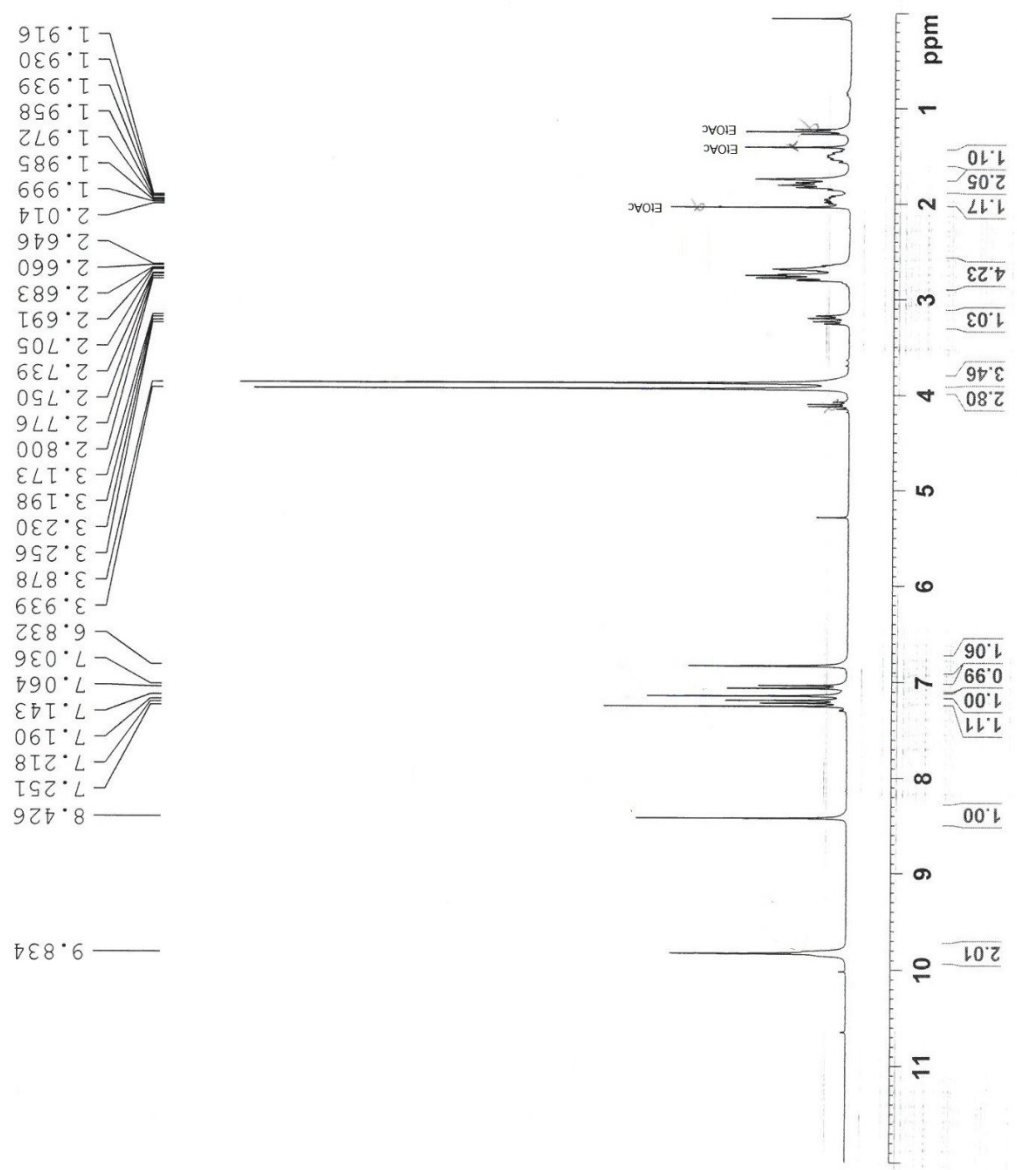

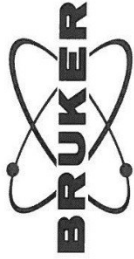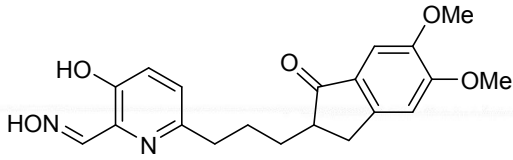

Current Data Parameters  
NAME gml175f2  
EXPNO 62  
PROCNO 1

F2 - Acquisition Parameters  
Date\_ 20100430  
Time 14.35  
INSTRUM spect  
PROBHD 5 mm QNP 1H/1  
PULPROG zgpg30  
TD 65536  
SOLVENT CDCl3  
NS 1024  
DS 4  
SWH 17985.611 Hz  
FIDRES 0.274439 Hz  
AQ 1.8219508 sec  
RG 10321.3  
DW 27.800 usec  
DE 10.00 usec  
TE 295.2 K  
d1 2.00000000 sec  
d11 0.03000000 sec  
DELTA 1.89999998 sec  
TD0 1

==== CHANNEL f1 =====  
NUC1 13C  
P1 6.75 usec  
PL1 0.00 dB  
SFO1 75.4752953 MHz

==== CHANNEL f2 =====  
CPDPRG2 waltz16  
NUC2 1H  
PCPD2 100.00 usec  
PL2 0.00 dB  
PL12 19.48 dB  
PL13 18.00 dB  
SFO2 300.1312005 MHz

F2 - Processing parameters  
SI 32768  
SF 75.4677490 MHz  
WDW EM  
SSB 0  
LB 1.00 Hz  
GB 0  
PC 1.40

gml175f2

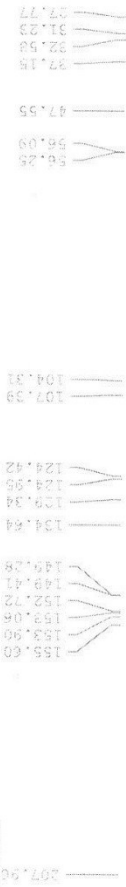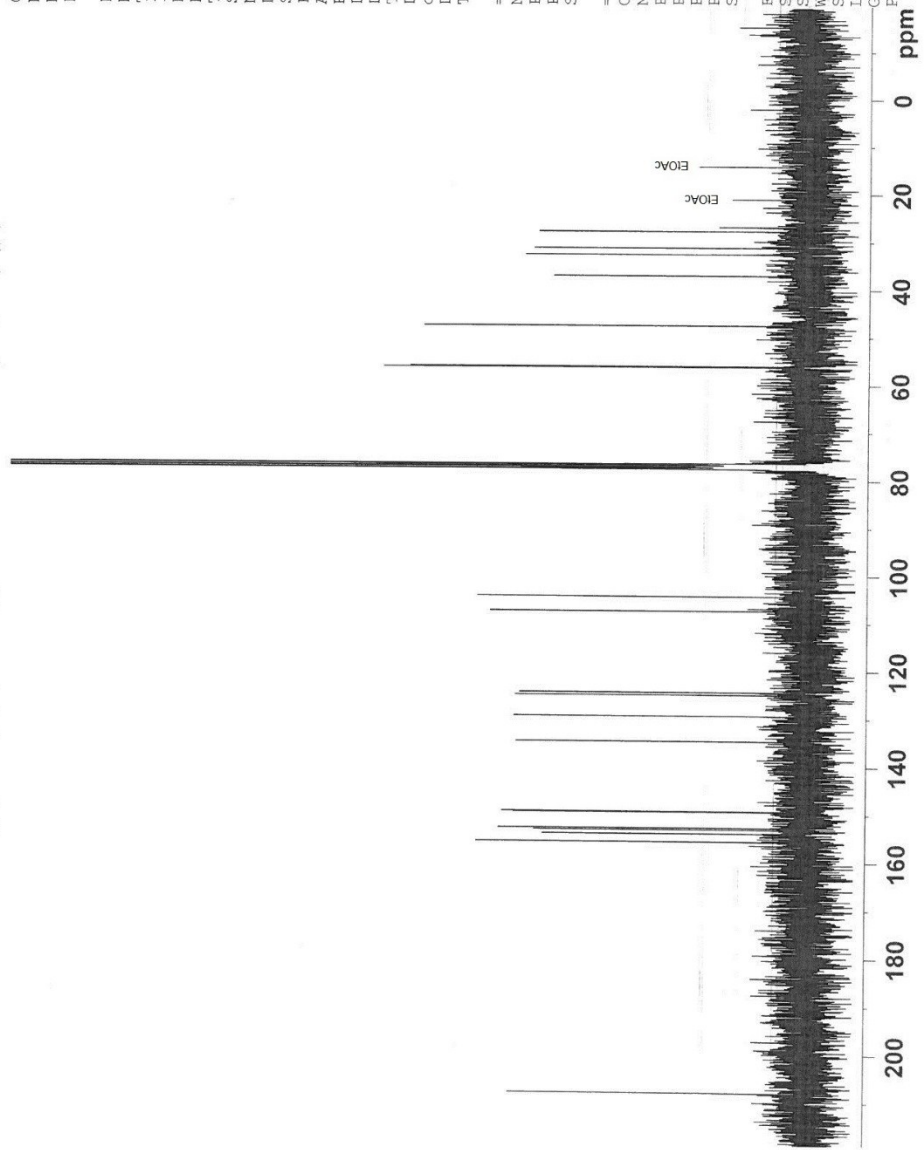

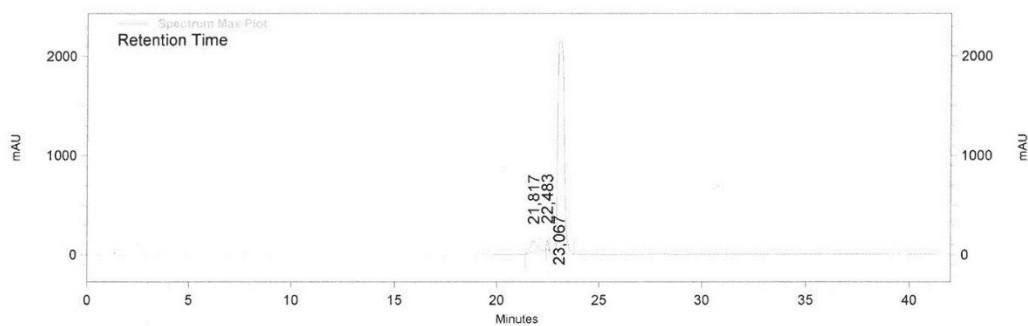

Spectrum Max  
 Plot Results  
 (System  
 (25/08/2011  
 10:25:25)  
 (Reprocessed))

| Retention Time | Height  | Height Percent | Area     | Area Percent |
|----------------|---------|----------------|----------|--------------|
| 21,817         | 110534  | 4,704          | 2383820  | 4,891        |
| 22,483         | 85799   | 3,652          | 545911   | 1,120        |
| 23,067         | 2153255 | 91,644         | 45807685 | 93,989       |
| Totals         | 2349588 | 100,000        | 48737416 | 100,000      |

Under these non-optimized HPLC conditions, the basic compound **3** is partially protonated and the purity (95.1%) was determined by the sum of the two peak areas of the protonated form ( $t_R = 23.07$  min) and of the unprotonated form ( $t_R = 22.48$  min). The UV absorption spectra were completely similar

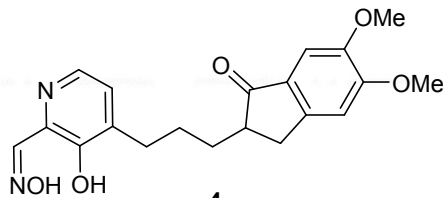

4

```

Current Data Parameters
NAME      gm293f1
EXPNO    65
PROCNO   1

F2 - Acquisition Parameters
Date_    20100908
Time     17.40
INSTRUM spect
PROBHD   5 mm QNP 1H/1
PULPROG zg30
TD       65536
SOLVENT  CDCl3
NS       15
DS       0
SWH      6172.839 Hz
FIDRES   0.094190 Hz
AQ       5.3084660 sec
RG       512
DW       81.000 usec
DE       10.00 usec
TE       614.2 K
D1       2.0000000 sec
TD0      1

===== CHANNEL f1 =====
NUC1     1H
P1       10.62 usec
PL1      0.00 dB
SFO1     300.1318534 MHz

F2 - Processing parameters
SI       32768
SF       300.1300134 MHz
WDW      EM
SSB      0
LB       0.30 Hz
GB       0
PC       1.00
  
```

gm293f1

2.041  
2.000  
1.987  
1.975  
1.966  
1.951  
1.946  
1.931  
1.791  
1.766  
1.740  
1.714  
1.688  
1.662  
1.577  
1.557  
1.545  
1.532  
1.526

2.730  
2.719  
2.695  
2.679  
2.670  
2.651

3.258  
3.232  
3.200  
3.173

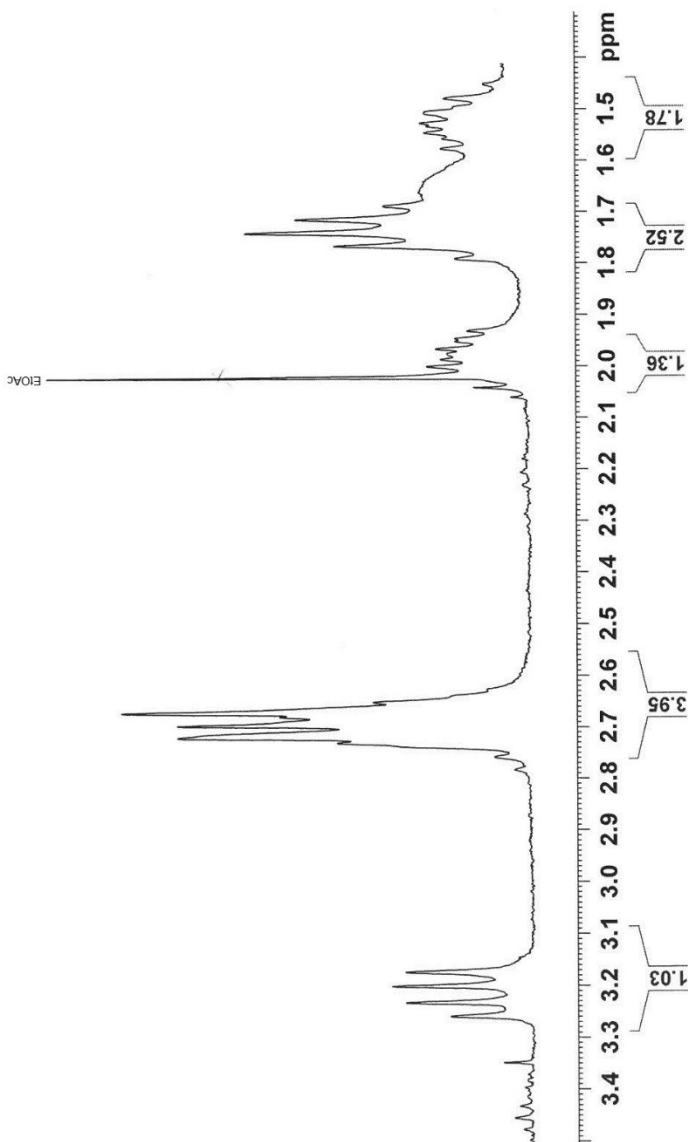

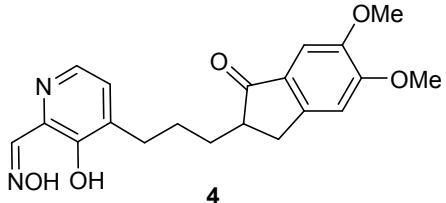

4

```

Current Data Parameters
NAME      gm293f1
EXPNO     65
PROCNO    1

F2 - Acquisition Parameters
Date_     20100908
Time      17.40
INSTRUM   spect
PROBHD    5 mm QNP 1H/1
PULPROG   zg30
TD         65536
SOLVENT   CDCl3
NS         15
DS         0
SWH        6172.839 Hz
FIDRES     0.094190 Hz
AQ          5.3084660 sec
RG          512
DW          81.000 usec
DE          10.00 usec
TE          614.2 K
D1          2.0000000 sec
TD0         1

===== CHANNEL f1 =====
NUC1       1H
P1         10.62 usec
PL1        0.00 dB
SFO1       300.1318534 MHz

F2 - Processing parameters
SI          32768
SF          300.1300134 MHz
WDW         EM
SSB         0
LB          0.30 Hz
GB          0
PC          1.00
  
```

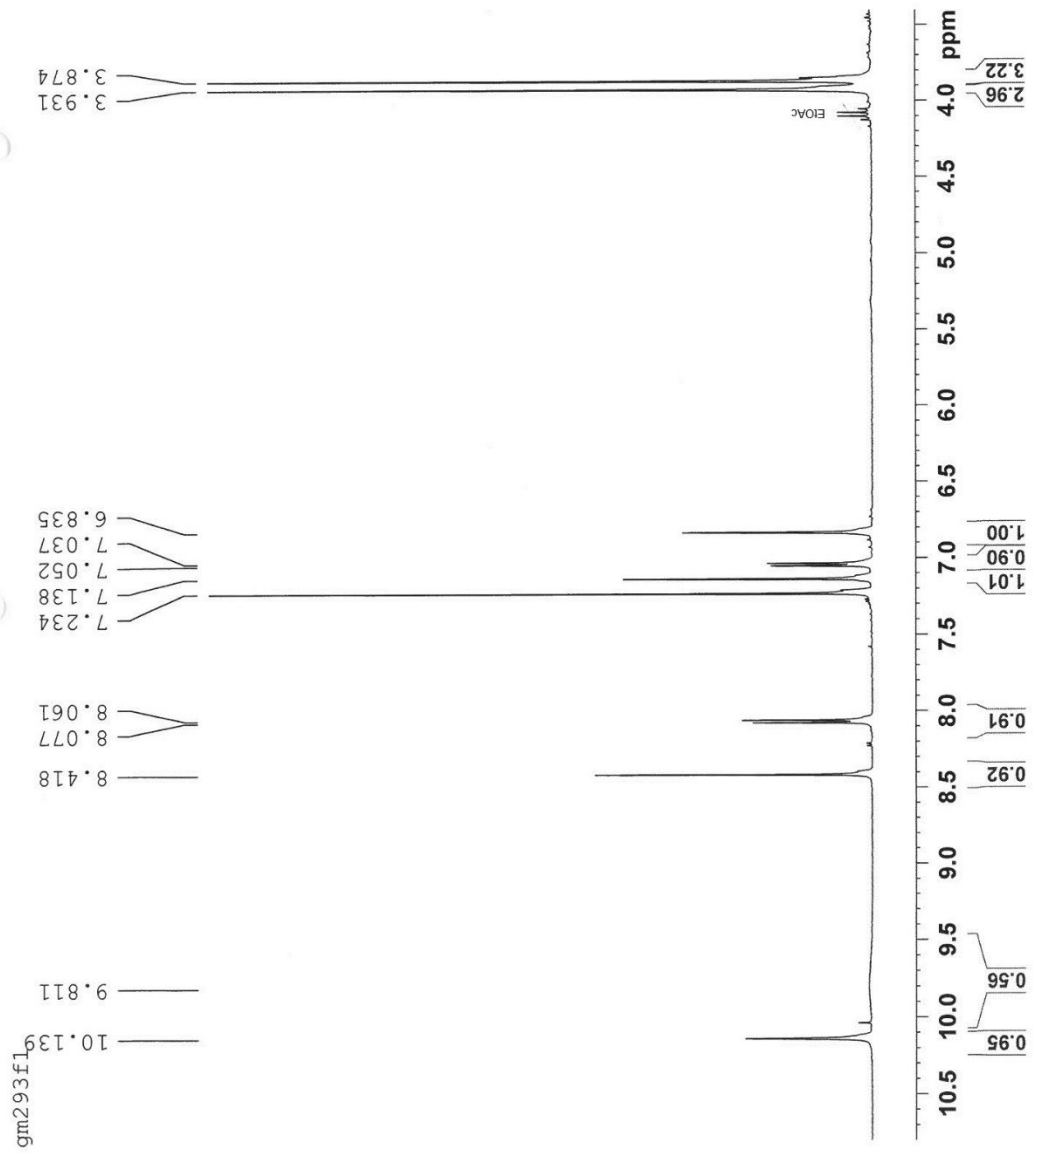



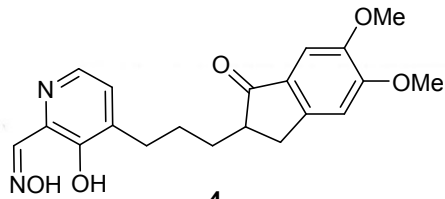

gm293f1c

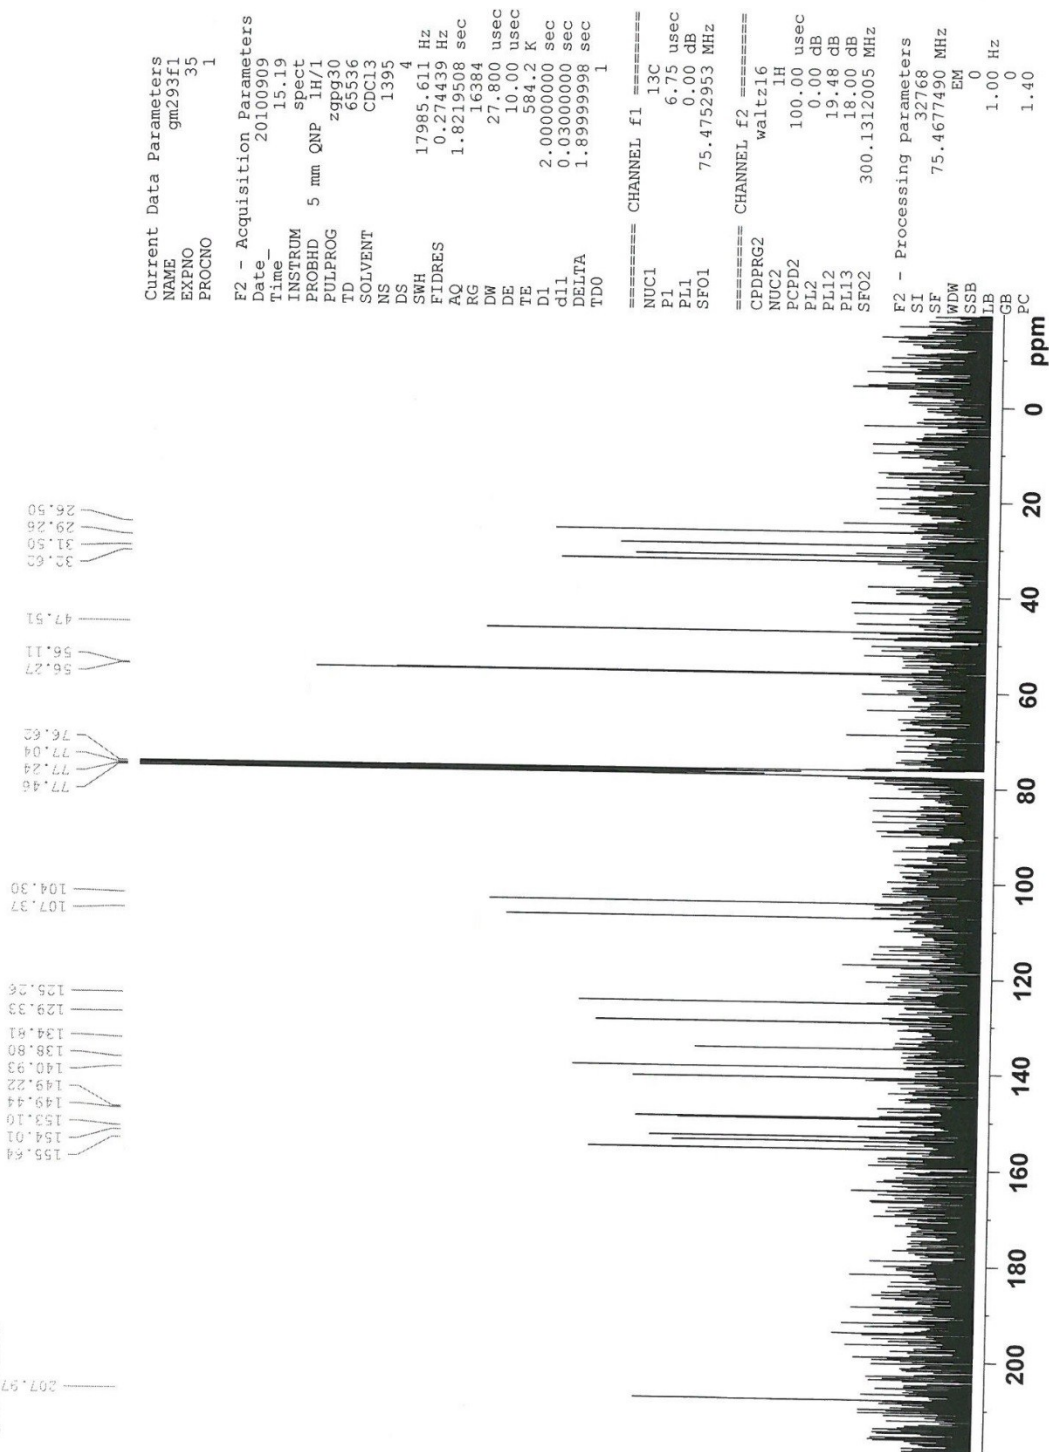

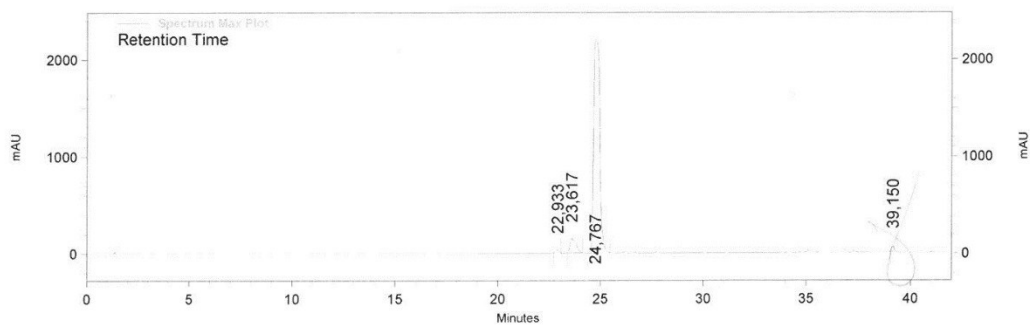

Spectrum Max  
 Plot Results  
 (System  
 (25/08/2011  
 10:52:10)  
 (Reprocessed))

| Retention Time | Height  | Height Percent | Area     | Area Percent |
|----------------|---------|----------------|----------|--------------|
| 22,933         | 30150   | 1,234          | 321232   | 0,655        |
| 23,617         | 145957  | 5,972          | 2916355  | 5,945        |
| 24,767         | 2201644 | 90,079         | 45255968 | 92,247       |
| 39,150         | 66369   | 2,715          | 565928   | 1,154        |
| Totals         | 2444120 | 100,000        | 49059483 | 100,000      |

Under these non-optimized HPLC conditions, the basic compound **4** is partially protonated and the purity (98.2 %) was determined by the sum of the two peak areas of the protonated form ( $t_R = 24.76$  min) and of the unprotonated form ( $t_R = 23.62$  min). The UV absorption spectra were completely similar.
